# Supplementary material for: Self-enhanced aerosol–fog interactions in two successive radiation fog events in the Yangtze River Delta, China: A simulation study
Source: Copernicus journal article supplement (doi:10.5194/acp-2022-833), 2023-01-24
Supplement: Supplementary file 1 [file acp-2022-833-supplement.pdf]

*Supplement of*

**Self-enhanced aerosol-fog interactions in two successive radiation fog events in the Yangtze River Delta: a simulation study**

**Naifu Shao et al.**

*Correspondence to:* Chunsong Lu (luchunsong110@gmail.com)

# Supporting materials for “Self-enhanced aerosol-fog interactions in two successive radiation fog events in the Yangtze River Delta: a simulation study”

The normalized mean bias (NMB), normalized mean error (NME), mean fractional bias (MFB), and mean fractional error (MFE) are calculated as follows (Eq.S1-S4):

$$\text{NMB} = \frac{\sum_{i=1}^N (M_i - O_i)}{\sum_{i=1}^N O_i} \quad (\text{S1})$$

$$\text{NME} = \frac{\sum_{i=1}^N |M_i - O_i|}{\sum_{i=1}^N O_i} \quad (\text{S2})$$

$$\text{MFB} = \frac{1}{N} \sum_{i=1}^N \frac{(M_i - O_i)}{(O_i + M_i / 2)} \quad (\text{S3})$$

$$\text{MFE} = \frac{1}{N} \sum_{i=1}^N \frac{|M_i - O_i|}{(O_i + M_i / 2)} \quad (\text{S4})$$

where  $M$  and  $O$  represent the results from simulation and observation;  $N$  is the total number of observation stations;  $i$  is the number for each site.

The following equations S5-S8 are the calculations about contributions to turbulent kinetic energy (TKE) including wind shear ( $TKE_{\text{shear}}$ ), buoyancy ( $TKE_{\text{buoy}}$ ), dissipation ( $TKE_{\text{diss}}$ ), and vertical mixing ( $TKE_{\text{mixing}}$ ).

$$TKE_{\text{shear}} = -\overline{u'w'} \frac{\partial u}{\partial z} - \overline{v'w'} \frac{\partial v}{\partial z} \quad (\text{S5})$$

$$TKE_{\text{buoy}} = \frac{g}{\theta} \overline{\theta'w'} \quad (\text{S6})$$

$$TKE_{\text{diss}} = \frac{q^3}{B_1 L} \quad (\text{S7})$$

$$TKE_{\text{mixing}} = -\frac{1}{2} \frac{\partial}{\partial z} \overline{q'w'} \quad (\text{S8})$$

where  $\overline{u'w'}$  and  $\overline{v'w'}$  are the Reynolds stress of the turbulent zonal pulsation  $u'$  and meridional pulsation  $v'$  in the vertical direction respectively,  $u$  and  $v$  are the zonal and meridional components of the horizontal wind,  $g$  is the acceleration of gravity,  $\theta$  is

potential temperature,  $\overline{\theta'_v w'}$  is virtual potential temperature turbulent flux,  $\varphi$  is the dynamic physical quantity (e.g.  $u$  and  $v$ ) or thermal quantity (e.g.  $\theta$ ),  $\overline{\varphi' w'}$  is the turbulent flux of dynamic or thermal quantity,  $q$  is related with TKE and its calculation is  $q = \sqrt{2TKE}$ ,  $B_1$  is closing constant,  $L$  is the master length scale,  $z$  is the height above ground.

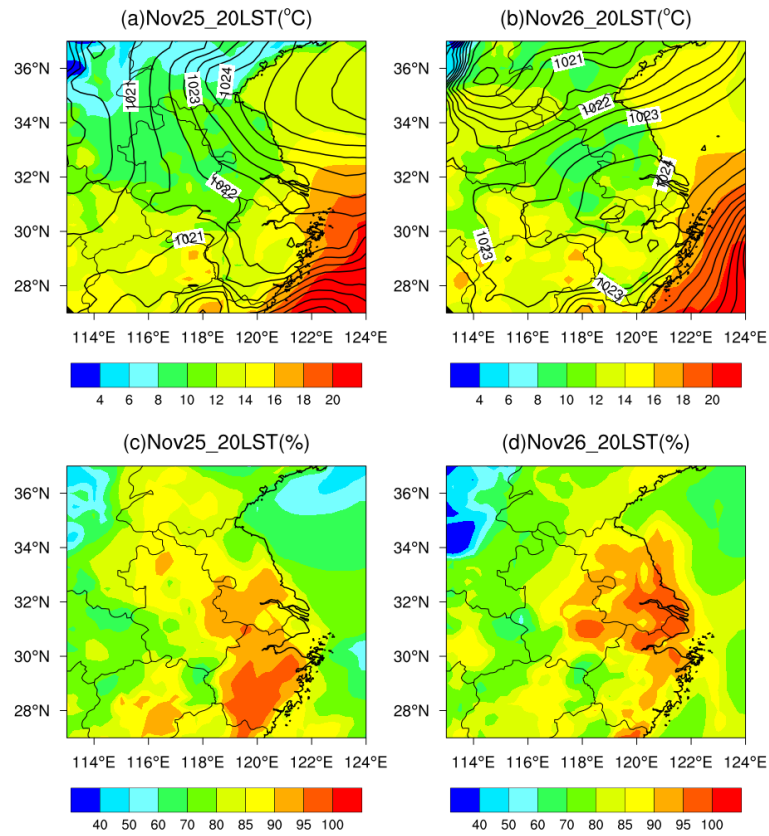

**Figure S1.** Surface weather map at 20:00 local standard time (LST = Universal Time Coordinated + 8 h) on 25 and 26 November 2018. (a-b) the shaded color is 2 m temperature ( $^{\circ}\text{C}$ ), the contour line is surface pressure (hPa), (c-d) the 2 m relative humidity (%). The time "Nov25\_20LST" means 20:00 LST on 25 November 2018. The other time expressions follow the same logic.

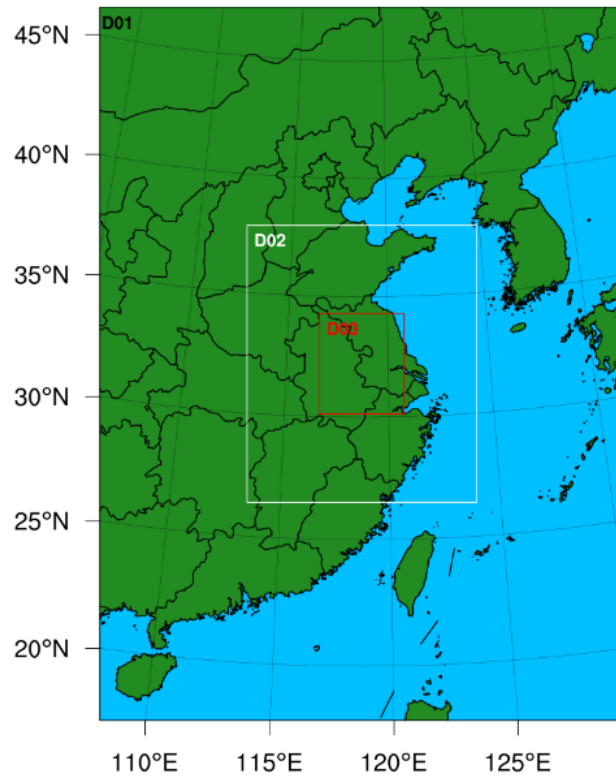

**Figure S2.** The model domain configuration with 3 nested domains and D01-D03 stand for domain 01-03, respectively.
